# Supplementary material for: Evaluation of Coriolis Micro Air Sampling to Detect Volatile and Semi-Volatile Organic Compounds
Source: MDPI journal article supplement (doi:10.3390/molecules27196462), 2022-09-30
Supplement: s1 [file s1]

**Table S1.** Physico-chemicals properties of molecules found with Coriolis micro.

| Coriolis Molecules                                                                     | MW<br>(g/mol) | Log K <sub>ow</sub> | Log K <sub>oa</sub> | Boiling<br>Point (°C) | Solubility<br>(mg/L)   | Vapor<br>Pressure<br>(Pa) | Henry's<br>Constant<br>(Pa.m <sup>3</sup> /mol) |
|----------------------------------------------------------------------------------------|---------------|---------------------|---------------------|-----------------------|------------------------|---------------------------|-------------------------------------------------|
| Nonanal                                                                                | 142.24        | 3.27                | 4.966               | 191                   | 131.6                  | 49                        | 50                                              |
| 1,2-ethanediol monoformate                                                             | 90.08         | -1.148              | 5.17                | 144.76                | 1 × 10 <sup>6</sup>    | 241                       | 1.18 × 10 <sup>-3</sup>                         |
| 1,2-ethanediol monoacetate                                                             | 104.11        | -0.601              | 5.86                | 188                   | 1 × 10 <sup>6</sup>    | 20.1                      | 8.62 × 10 <sup>-4</sup>                         |
| Methylal                                                                               | 76.1          | -0.195              | 2.494               | 42                    | 1.33 × 10 <sup>5</sup> | 5.31×10 <sup>4</sup>      | 5.13                                            |
| 2-ethyl-1hexanol                                                                       | 130.23        | 2.732               | 5.627               | 184.6                 | 1379                   | 18.1                      | 3.14                                            |
| 1-octanol                                                                              | 130.23        | 3                   | 5.707               | 195.1                 | 814                    | 10.6                      | 3.14                                            |
| Diethyl carbitol                                                                       | 162.23        | 0.5                 | 5.324               | 188                   | 3.11 × 10 <sup>4</sup> | 69.5                      | 3.72 × 10 <sup>-2</sup>                         |
| (S)-(+)-6-methyl-1-octanol                                                             | 144.26        | 3.223               | 5.994               | 208.49                | 459.7                  | 5.88                      | 4.17                                            |
| Undecane                                                                               | 156.31        | 5.744               | 3.281               | 195.9                 | 0.2571                 | 54.9                      | 7.13 × 10 <sup>5</sup>                          |
| Tetraethylene glycol                                                                   | 194.23        | -2.023              | 8.68                | 328                   | 1 × 10 <sup>6</sup>    | 0.0062                    | 4.97 × 10 <sup>-8</sup>                         |
| Pyridine                                                                               | 79.1          | 0.804               | 4.34                | 115.2                 | 7.3 × 10 <sup>5</sup>  | 2.77 × 10 <sup>3</sup>    | 0.714                                           |
| Triethylene glycol                                                                     | 150.18        | -1.748              | 8                   | 285                   | 1 × 10 <sup>6</sup>    | 0.176                     | 3.2 × 10 <sup>-6</sup>                          |
| 1,3-dioxolane-2-methanol                                                               | 104.11        | -0.405              | 6.96                | 178.11                | 8.15 × 10 <sup>5</sup> | 36.1                      | 1.1 × 10 <sup>-4</sup>                          |
| Dodecanoic acid                                                                        | 200.32        | 4.998               | 8.42                | 298.9                 | 12.76                  | 0.00213                   | 0.944                                           |
| Pentaethylene glycol                                                                   | 238.28        | -2.297              | 10.207              | 353.51                | 1 × 10 <sup>6</sup>    | 3.98 × 10 <sup>-5</sup>   | 7.73 × 10 <sup>-10</sup>                        |
| 1,2-benzenedicarboxylic acid,<br>bis(2-methylpropyl) ester                             | 278.35        | 4.463               | 8.762               | 296                   | 5.061                  | 0.322                     | 0.124                                           |
| 7,9-Di-tert-butyl-1-<br>oxaspiro(4,5)deca-6,9-diene-<br>2,8-dione                      | 276.38        | 3.554               | 8.614               | 384.56                | 15.5                   | 2.06 × 10 <sup>-4</sup>   | 0.0213                                          |
| n-Hexadecanoic acid                                                                    | 256.43        | 6.962               | 9.888               | 351.5                 | 0.04                   | 5.07 × 10 <sup>-5</sup>   | 2.93                                            |
| Phenol                                                                                 | 94.11         | 1.513               | 6.149               | 181.8                 | 2.62 × 10 <sup>4</sup> | 46.7                      | 5.68 × 10 <sup>-2</sup>                         |
| Benzaldehyde, 2,5-dimethyl-                                                            | 134.18        | 2.805               | 5.974               | 220                   | 356.1                  | 17.5                      | 1.66                                            |
| 1-dodecanol                                                                            | 186.34        | 4.77                | 7.175               | 259                   | 6.898                  | 0.113                     | 9.76                                            |
| Oxime, methoxy-phenyl                                                                  | 151.17        | 1.162               | 7.927               | 276.2                 | 7627                   | 0.0779                    | 4.24 × 10 <sup>-4</sup>                         |
| Dodecane                                                                               | 170.34        | 6.235               | 3.648               | 216.3                 | 0.1099                 | 18                        | 9.47 × 10 <sup>5</sup>                          |
| Benzoic acid, 4-ethoxy, ethyl<br>ester                                                 | 194.23        | 2.891               | 6.72                | 275                   | 39.44                  | 0.653                     | 0.367                                           |
| Cyclopentaneacetic acid, 3-<br>oxo-2-pentyl, methyl ester                              | 226.32        | 2.975               | 7.668               | 309.32                | 91.72                  | 0.158                     | 5.08 × 10 <sup>-2</sup>                         |
| Benzenesulfonamide, N-<br>butyl                                                        | 213.3         | 2.309               | 6.362               | 314                   | 398                    | 0.0189                    | 0.22                                            |
| Acetonitrile                                                                           | 41.05         | -0.146              | 2.753               | 81.6                  | 1.37 × 10 <sup>5</sup> | 1.18 × 10 <sup>4</sup>    | 3.1                                             |
| Triethyl phosphate                                                                     | 182.16        | 0.872               | 5.493               | 215.5                 | 1.12 × 10 <sup>4</sup> | 52.4                      | 5.91 × 10 <sup>-2</sup>                         |
| 1-octene, 6-methyl                                                                     | 126.24        | 4.551               | 3.015               | 127.33                | 3.583                  | 1.83 × 10 <sup>3</sup>    | 8.5 × 10 <sup>4</sup>                           |
| 1,2-Benzothiazole                                                                      | 135.18        | 2.169               | 5.937               | 220                   | 1232                   | 12.4                      | 0.424                                           |
| Tetradecanoic acid                                                                     | 228.38        | 5.98                | 9.154               | 326.2                 | 0.4668                 | 1.87 × 10 <sup>-4</sup>   | 1.66                                            |
| Iridomyrmecin                                                                          | 168.24        | 1.892               | 3.884               | 276.6                 | 1518                   | 0.416                     | 25.1                                            |
| Benzamide, N,N-diethyl-4-<br>methyl                                                    | 191.28        | 2.258               | 8.33                | 308.11                | 449.4                  | 0.0442                    | 2.1 × 10 <sup>-3</sup>                          |
| Propanoic acid, 2-methyl, 2,2-<br>dimethyl-1-(2-hydroxy-1-<br>methylethyl)propyl ester | 216.32        | 2.997               | 8.474               | 263.84                | 321.5                  | 0.173                     | 8.32 × 10 <sup>-3</sup>                         |

|                                                                                |        |       |        |        |                    |                      |                       |
|--------------------------------------------------------------------------------|--------|-------|--------|--------|--------------------|----------------------|-----------------------|
| Propanoic acid, 2-methyl, 1-(1,1-dimethylethyl)-2-methyl-1,3-propanediyl ester | 286.42 | 4.911 | 8.324  | 271.5  | 0.9422             | 1.13                 | 0.955                 |
| 4-Heptanone, 2-methyl                                                          | 128.22 | 2.147 | 4.229  | 155    | 1371               | 548                  | 20.7                  |
| Pentadecanoic acid                                                             | 242.41 | 6.471 | 9.52   | 339.1  | 0.1925             | $5.8 \times 10^{-5}$ | 2.21                  |
| Acetic acid                                                                    | 60.05  | 0.087 | 4.74   | 117.9  | $4.76 \times 10^5$ | $2.09 \times 10^3$   | $5.55 \times 10^{-2}$ |
| 1,2-ethanediol diformate                                                       | 118.09 | -0.69 | 3.681  | 174    | $3.96 \times 10^5$ | 172                  | 0.105                 |
| Dodecanal                                                                      | 184.32 | 4.745 | 6.078  | 252.62 | 4.649              | 2.04                 | $1.17 \times 10^2$    |
| Dimethyl phthalate                                                             | 194.19 | 1.663 | 6.698  | 283.7  | 2014               | 0.411                | $2.27 \times 10^{-2}$ |
| Diethyl Phthalate                                                              | 222.24 | 2.646 | 7.443  | 295    | 287.2              | 0.28                 | $3.99 \times 10^{-2}$ |
| 2-propanol, 1-chloro-phosphate                                                 | 327.57 | 2.886 | 8.503  | 365.49 | 51.85              | 0.00753              | $6.04 \times 10^{-3}$ |
| Benzyl butyl phthalate                                                         | 312.37 | 4.845 | 10.603 | 370    | 0.9489             | 0.0011               | $4.28 \times 10^{-3}$ |

**Table S2.** Physico-chemicals properties of molecules found with Nalophan® bags.

| Nalophan® Bags Molecules   | Log K <sub>ow</sub> | Log K <sub>oa</sub> | Boiling Point (°C) | Solubility (mg/L)  | Vapor pressure (Pa) | Henry's constant (Pa.m <sup>3</sup> /mol) |
|----------------------------|---------------------|---------------------|--------------------|--------------------|---------------------|-------------------------------------------|
| Dichlorodifluoromethane    | 1.816               | 0.751               | -29.8              | 258                | $6.45 \times 10^5$  | $2.91 \times 10^4$                        |
| 2-butene                   | 2.091               | 1.098               | 3.73               | 423.5              | $2.31 \times 10^5$  | $2.43 \times 10^4$                        |
| Butane                     | 2.306               | 0.712               | -0.5               | 135.6              | $2.43 \times 10^5$  | $9.82 \times 10^4$                        |
| 2-methylbutane             | 2.723               | 0.998               | 27.8               | 184.6              | $9.19 \times 10^4$  | $1.3 \times 10^5$                         |
| Trichloromonofluoromethane | 2.129               | 1.812               | 23.7               | 593.2              | $1.07 \times 10^5$  | $5.15 \times 10^3$                        |
| 2-methyl-1-propene         | 2.226               | 1.238               | -6.9               | 399.2              | $3.08 \times 10^5$  | $2.43 \times 10^4$                        |
| Acetone                    | -0.235              | 2.453               | 56                 | $2.2 \times 10^5$  | $3.09 \times 10^4$  | 5.02                                      |
| Pentane                    | 2.797               | 1.078               | 36                 | 49.76              | $6.85 \times 10^4$  | $1.3 \times 10^5$                         |
| Isoprene                   | 2.58                | 1.882               | 34                 | 338.6              | $7.33 \times 10^4$  | $1.24 \times 10^4$                        |
| 3-methylpentane            | 3.214               | 1.365               | 63.2               | 31.09              | $2.53 \times 10^4$  | $1.75 \times 10^5$                        |
| 2-methylpentane            | 3.214               | 1.365               | 60.2               | 66.35              | $2.81 \times 10^4$  | $1.73 \times 10^5$                        |
| Methyl tert-butyl ether    | 1.429               | 2.513               | 55.2               | $1.98 \times 10^4$ | $3.33 \times 10^4$  | $2.04 \times 10^2$                        |
| 3-buten-2-one              | 0.408               | 3.382               | 81.4               | $6.06 \times 10^4$ | $1.22 \times 10^4$  | 2.65                                      |
| Butanone                   | 0.256               | 2.83                | 79.5               | $7.61 \times 10^4$ | $1.21 \times 10^4$  | 6.67                                      |
| Ethyl tert butyl ether     | 1.92                | 2.88                | 73.1               | 2640               | $1.65 \times 10^4$  | $2.71 \times 10^2$                        |
| 2-methyl-1-propanol        | 0.767               | 4.159               | 107.8              | $9.71 \times 10^4$ | $1.4 \times 10^3$   | 1.01                                      |
| Vinyl methacrylate         | 1.63                | 3.035               | 115.98             | 4341               | $2.49 \times 10^3$  | 97.6                                      |
| Allyl methacrylate         | 2.121               | 4.23                | 138.95             | 1470               | 769                 | 19.3                                      |
| 2-butenal (Z)              | 0.601               | 3.239               | 102.2              | $4.18 \times 10^4$ | $4 \times 10^3$     | 5.68                                      |
| 1,2-dichloro ethane        | 1.832               | 2.136               | 83.5               | 6414               | $1 \times 10^4$     | $1.23 \times 10^3$                        |
| Butan-1-ol                 | 0.841               | 4.229               | 117.7              | $7.67 \times 10^4$ | $8.93 \times 10^2$  | 1.01                                      |
| Cyclohexane                | 3.176               | 2.162               | 80.7               | 43.02              | $1.29 \times 10^4$  | $2.59 \times 10^4$                        |
| 3-ethyl-2-pentanone        | 1.656               | 3.861               | 127.98             | 4057               | $1.78 \times 10^3$  | 15.6                                      |
| 2,2-dimethyl hexane        | 4.159               | 2.07                | 106.8              | 8.576              | $4.53 \times 10^3$  | $3.05 \times 10^5$                        |
| Pentanal                   | 1.307               | 3.497               | 103                | 9718               | $3.47 \times 10^3$  | 16.1                                      |
| 3,3,4-trimethyl hexane     | 4.577               | 2.37                | 140.5              | 3.349              | $1.18 \times 10^3$  | $4.05 \times 10^5$                        |
| Ethanediol                 | -1.2                | 4.071               | 197.3              | $1 \times 10^6$    | 12.3                | $1.32 \times 10^{-2}$                     |
| 3-methylheptane            | 4.197               | 2.11                | 118                | 7.965              | $2.61 \times 10^3$  | $3.05 \times 10^5$                        |
| Toluene                    | 2.54                | 3.154               | 110.6              | 573.1              | $3.79 \times 10^3$  | $6.02 \times 10^2$                        |
| 2,4-dimethyl-3-pentanone   | 1.582               | 3.781               | 125.4              | 2716               | $1.79 \times 10^3$  | 15.6                                      |

|                          |       |       |        |                    |                    |                       |
|--------------------------|-------|-------|--------|--------------------|--------------------|-----------------------|
| 1,3-dimethyl cyclohexane | 4.011 | 2.75  | 122.5  | 11.67              | $2.85 \times 10^3$ | $4.56 \times 10^4$    |
| 2,3,5-trimethyl hexane   | 4.541 | 2.33  | 131.4  | 3.593              | $1.56 \times 10^3$ | $4.05 \times 10^5$    |
| 3,4-dimethyl-1-pentanol  | 2.167 | 5.19  | 154.62 | 4723               | 139                | 2.37                  |
| 4-methyloctane           | 4.688 | 2.5   | 142.4  | 2.691              | 911                | $4.05 \times 10^5$    |
| Ethylbenzene             | 3.031 | 3.521 | 136.1  | 228.6              | $1.28 \times 10^3$ | 800                   |
| o-xylene                 | 3.088 | 3.662 | 144.5  | 224.1              | 881                | 665                   |
| Heptanal                 | 2.29  | 4.231 | 152.8  | 1167               | 469                | 28.3                  |
| Styrene                  | 2.895 | 3.838 | 145    | 343.7              | 853                | 280                   |
| m-xylene                 | 3.088 | 3.662 | 139.1  | 207.2              | 1110               | 665                   |
| 1-butoxy-2-propanol      | 0.984 | 6.255 | 171.5  | $4.21 \times 10^4$ | 53                 | $1.32 \times 10^{-2}$ |
| Alpha-pinene +           | 4.269 | 3.629 | 155.9  | 4.071              | 633                | $1.08 \times 10^4$    |
| Propyl benzene           | 3.523 | 3.887 | 159.2  | 70.73              | 456                | $1.06 \times 10^3$    |
| 1-ethyl-2-methylbenzene  | 3.579 | 4.028 | 165.2  | 96.88              | 348                | 883                   |
| 1-ethyl-4-methylbenzene  | 3.579 | 4.028 | 162    | 79.59              | 400                | 883                   |
| Benzaldehyde             | 1.71  | 4.971 | 179    | 6100               | 169                | 1.36                  |
| Beta pinene              | 4.347 | 3.532 | 166    | 7.061              | 391                | $1.63 \times 10^4$    |
| Octanal                  | 2.781 | 4.599 | 171    | 394.3              | 157                | 37.6                  |
| Cumene                   | 3.449 | 3.817 | 152.4  | 75.03              | 600                | $1.06 \times 10^3$    |
| 2-ethyl-1hexanol         | 2.732 | 5.627 | 184.6  | 1379               | 18.1               | 3.14                  |
| D-limonene               | 4.827 | 3.639 | 176    | 4.581              | 207                | $3.85 \times 10^4$    |
| Nonanal                  | 3.27  | 4.966 | 191    | 131.6              | 49.3               | 50                    |
| Decanal                  | 3.763 | 5.33  | 208.5  | 43.52              | 13.7               | 66.3                  |

**Table S3.** details of statistical tests.

| Properties       | Sampling points | Sampling types | Shapiro-Wilk | Student               | Test U               |
|------------------|-----------------|----------------|--------------|-----------------------|----------------------|
| Molecular weight | P6              | Coriolis micro | 0.6361       | 0.0044                | -                    |
|                  |                 | Nalophan®      | 0.2793       |                       |                      |
|                  | P10             | Coriolis micro | 0.9036       | 0.0014                | -                    |
|                  |                 | Nalophan®      | 0.06         |                       |                      |
|                  | P15             | Coriolis micro | 0.6958       | 0.0003621             | -                    |
|                  |                 | Nalophan®      | 0.6162       |                       |                      |
|                  | CR              | Coriolis micro | 0.1965       | $2.33 \times 10^{-6}$ | -                    |
|                  |                 | Nalophan®      | 0.1918       |                       |                      |
|                  | CM              | Coriolis micro | 0.8877       | 0.00018               | -                    |
|                  |                 | Nalophan®      | 0.7911       |                       |                      |
|                  | ST              | Coriolis micro | 0.06         | -                     | 0.0008               |
|                  |                 | Nalophan®      | 0.018        |                       |                      |
| Solubility       | P6              | Coriolis micro | 0.01049      | -                     | $6.8 \times 10^{-7}$ |
|                  |                 | Nalophan®      | 0.49         |                       |                      |
|                  | P10             | Coriolis micro | 0.6579       | 0.6713                | -                    |
|                  |                 | Nalophan®      | 0.2534       |                       |                      |
|                  | P15             | Coriolis micro | 0.1895       | 0.8903                | -                    |
|                  |                 | Nalophan®      | 0.0498       |                       |                      |
|                  | CR              | Coriolis micro | 0.4567       | 0.7337                | -                    |
|                  |                 | Nalophan®      | 0.2543       |                       |                      |
|                  | CM              | Coriolis micro | 0.3765       | 0.2745                | -                    |
|                  |                 | Nalophan®      | 0.2248       |                       |                      |
|                  | ST              | Coriolis micro | 0.1757       | 0.05682               | -                    |

|                     |     |                |                         |                        |           |
|---------------------|-----|----------------|-------------------------|------------------------|-----------|
|                     |     | Nalophan®      | 0.05899                 |                        |           |
| Log K <sub>ow</sub> | P6  | Coriolis micro | 0.311                   | 0.4443                 |           |
|                     |     | Nalophan®      | 0.4794                  |                        |           |
|                     | P10 | Coriolis micro | 0.8882                  | 0.9099                 | -         |
|                     |     | Nalophan®      | 0.3963                  |                        |           |
|                     | P15 | Coriolis micro | 0.4764                  | 0.9773                 | -         |
|                     |     | Nalophan®      | 0.004287                |                        |           |
|                     | CR  | Coriolis micro | 0.1679                  | 0.8853                 | -         |
|                     |     | Nalophan®      | 0.2991                  |                        |           |
|                     | CM  | Coriolis micro | 0.6537                  | 0.3406                 | -         |
|                     |     | Nalophan®      | 0.03555                 |                        |           |
|                     | ST  | Coriolis micro | 0.1794                  | 0.08845                | -         |
|                     |     | Nalophan®      | 0.3273                  |                        |           |
| Log K <sub>oa</sub> | P6  | Coriolis micro | 0.6765                  | $1.04 \times 10^{-5}$  | -         |
|                     |     | Nalophan®      | 0.2171                  |                        |           |
|                     | P10 | Coriolis micro | 0.8656                  | $1.31 \times 10^{-7}$  | -         |
|                     |     | Nalophan®      | 0.4143                  |                        |           |
|                     | P15 | Coriolis micro | 0.6501                  | 0.0001138              |           |
|                     |     | Nalophan®      | 0.7571                  |                        |           |
|                     | CR  | Coriolis micro | 0.5411                  | $1.242 \times 10^{-7}$ |           |
|                     |     | Nalophan®      | 0.5744                  |                        |           |
|                     | CM  | Coriolis micro | 0.8884                  | $2.228 \times 10^{-6}$ |           |
|                     |     | Nalophan®      | 0.4885                  |                        |           |
|                     | ST  | Coriolis micro | 0.4816                  | 0.002917               |           |
|                     |     | Nalophan®      | 0.4552                  |                        |           |
| Henry               | P6  | Coriolis micro | $4.1 \times 10^{-7}$    | -                      | 0.0004294 |
|                     |     | Nalophan®      | $1.5 \times 10^{-7}$    |                        |           |
|                     | P10 | Coriolis micro | $3.037 \times 10^{-5}$  | -                      | 0.2753    |
|                     |     | Nalophan®      | $8.27 \times 10^{-9}$   |                        |           |
|                     | P15 | Coriolis micro | $3.05 \times 10^{-6}$   | -                      | 0.1993    |
|                     |     | Nalophan®      | $3.226 \times 10^{-5}$  |                        |           |
|                     | CR  | Coriolis micro | $5.89 \times 10^{-6}$   | -                      | 0.04349   |
|                     |     | Nalophan®      | $3.92 \times 10^{-8}$   |                        |           |
|                     | CM  | Coriolis micro | $1.329 \times 10^{-6}$  | -                      | 0.3785    |
|                     |     | Nalophan®      | $1.885 \times 10^{-6}$  |                        |           |
|                     | ST  | Coriolis micro | 0.001184                | -                      | 0.1993    |
|                     |     | Nalophan®      | $5.789 \times 10^{-11}$ |                        |           |
| Boiling point       | P6  | Coriolis micro | 0.4633                  | 0.7825                 | -         |
|                     |     | Nalophan®      | 0.747                   |                        |           |
|                     | P10 | Coriolis micro | 0.4633                  | 0.431                  | -         |
|                     |     | Nalophan®      | 0.6369                  |                        |           |
|                     | P15 | Coriolis micro | 0.253                   | 0.593                  | -         |
|                     |     | Nalophan®      | 0.2983                  |                        |           |
|                     | CR  | Coriolis micro | 1                       | 0.6258                 | -         |
|                     |     | Nalophan®      | 0.6878                  |                        |           |
|                     | CM  | Coriolis micro | 0.1572                  | 0.6698                 | -         |
|                     |     | Nalophan®      | 0.2196                  |                        |           |
|                     | ST  | Coriolis micro | $2.2 \times 10^{-6}$    | -                      | 0.306     |
|                     |     | Nalophan®      | 1                       |                        |           |
| Vapor pressure      | -   | Coriolis micro | 0.4633                  | 1                      | -         |

---

---

Nalophan®

0.1939

---
